# Supplementary material
Source: HighWire-hosted journal article supplement (http://www.cmaj.ca/highwire/filestream/70266/field_highwire_adjunct_files/5/171333-res-6-at.pdf)
Supplement: 171333-res-6-at.pdf [file 171333-res-6-at.pdf]

**Appendix 6 (as supplied by the authors): Description of adverse events: Summary of any adverse events of trials included in review of anticonvulsants for low back pain ± radiating leg pain and lumbar radicular pain.**

| Study                             | Treatment group (TG)                         | Placebo group (PG)                            | Description and frequency of adverse events (TG / PG)                                                                                                                                                                                                                                                                                                                                                                                                                                                                                                           |
|-----------------------------------|----------------------------------------------|-----------------------------------------------|-----------------------------------------------------------------------------------------------------------------------------------------------------------------------------------------------------------------------------------------------------------------------------------------------------------------------------------------------------------------------------------------------------------------------------------------------------------------------------------------------------------------------------------------------------------------|
| <b>Atkinson 2016</b>              | Gabapentin 3600 mg/d<br>(49/55; 89.1%)       | Placebo<br>(35/53; 66.0%)                     | Fatigue (27 / 15), Orthostatic dizziness (24 / 14), Decreased salivation (22 / 10), Concentration difficulties (21 / 6), Increased sleep (21 / 11), Accommodation disturbance (19 / 3), Loss of balance (18 / 2), Failing memory (9 / 1), Constipation (7 / 9), Nausea/Vomiting (7 / 8), Polyuria/polydipsia (7 / 6), Reduced sleep (7 / 10), Erectile dysfunction (6 / 2), Weight gain (6 / 1), Decreased sexual desire (5 / 2), Increased dreaming (5 / 5), Tensions (5 / 1), Tension headache (3 / 2), Micturition disturbance (2 / 4), Paraesthesia (2 / 3) |
| <b>Baron 2010</b>                 | Pregabalin 600 mg/d<br>(31/110; 28.2%)       | Placebo<br>(26/107; 24.3%)                    | Peripheral oedema (5 / 2), Dizziness (4 / 2), Headache (1 / 4), Weight increase (3 / 2), Somnolence (1 / 1), Fatigue (0 / 2), Dry mouth (1 / 1), Constipation (1 / 0);<br>Serious AE: Jaundice (1 / 0), Ankle Fracture (1 / 0)                                                                                                                                                                                                                                                                                                                                  |
| <b>Khoromi 2005 <sup>a</sup></b>  | Topiramate 400 mg/d<br>(25/29; 86.2%)        | Active placebo <sup>b</sup><br>(21/29; 72.4%) | Paraesthesia (11 / 6), Fatigue/weakness (10 / 10), Sedation (10 / 1), Diarrhoea (9 / 3), Headache (3 / 3), Constipation (2 / 0), Depression (2 / 0), Joint pain (2 / 1), Leg cramps (2 / 5), Amnesia (1 / 0), Anorexia (0 / 1), Frequent urination (1 / 0), Thirst (1 / 0), Eyes twitching (1 / 0), Oedema (1 / 0), Speech difficulty (1 / 0), Blurred vision (1 / 0), Photophobia (1 / 0), Bleedings gums (1 / 0), Tremor (0 / 1), Somnolence (1 / 0), Extremely yellow urine (1 / 0), Decreased libido (1 / 0)                                                |
| <b>Markman 2015 <sup>a</sup></b>  | Pregabalin 300 mg/d<br>(19/28; 67.9%)        | Active placebo <sup>b</sup><br>(9/26; 34.6%)  | Dizziness (12 / 1), Confusion (2 / 0) Constipation (1 / 0), Diarrhoea (3 / 2), Somnolence (5 / 2), Dry mouth (4 / 2), Nausea (3 / 4), Peripheral oedema (5 / 2), Vision changes (2 / 0), Headache (0 / 1), Frequent urination (0 / 1)                                                                                                                                                                                                                                                                                                                           |
| <b>Mathieson 2017</b>             | Pregabalin 600 mg/d<br>(68/106; 64.2%)       | Placebo<br>(43/101; 42.6%)                    | Dizziness (42 / 13), Dorsalgia (22 / 10), Sweating (11 / 15), Malaise (11 / 5), Joint disorder (5 / 0), Anxiety (5 / 4), Peripheral limb pains (4 / 6), Nausea/Vomiting (7 / 2), Disturbance of skin sensation (2 / 6), Somnolence (6 / 4), Cognitive dysfunction (8 / 2), Headache (6 / 3), Others (53 / 42);<br>Serious AE: Hospitalisation for chest pain (0 / 1), for dyspnoea (1 / 0), for back pain (0 / 3), for psychological distress (0 / 1), Suicide attempt (0 / 1), Suicidal thoughts (1 / 0)                                                       |
| <b>McCleane 2000 <sup>a</sup></b> | Gabapentin 15 mg/kg/d<br>(9/30; 30.0%)       | Placebo<br>(2/30; 6.7%)                       | Nausea (2 / 2), Drowsiness (2 / 0), Headaches (2 / 0), Forgetfulness (1 / 0), Constipation (1 / 0), Feeling of being "high" (1 / 0)                                                                                                                                                                                                                                                                                                                                                                                                                             |
| <b>McCleane 2001</b>              | Gabapentin 1200 mg/d<br>No data <sup>c</sup> | Placebo<br>No data <sup>c</sup>               | Nausea (6 / 5), Dizziness (5 / 0), Drowsiness (2 / 0), Loss of energy (2 / 0), Heartburn (0 / 2), Blurred vision (1 / 0), Restlessness (1 / 0), Headache (1 / 1), Disorientation (1 / 0), Skin rash (0 / 1), Constipation (0 / 1), Unpleasant dreams (0 / 1), Urinary frequency (0 / 1)                                                                                                                                                                                                                                                                         |
| <b>Muehlbacher 2006</b>           | Topiramate 300 mg/d<br>No data <sup>c</sup>  | Placebo<br>No data <sup>c</sup>               | Dizziness (5 / 3), Headache (4 / 3), Paraesthesia and/or tremor (3 / 1), Severe somnolence (2 / 0), Vision problems (2 / 1), Psychomotor slowing (2 / 1), Memory problems (2 / 1)                                                                                                                                                                                                                                                                                                                                                                               |
| <b>Yildirim 2003</b>              | Gabapentin 3600 mg/d<br>(2/25; 8.0%)         | Placebo<br>(0/25; 0.0%)                       | Dizziness (1 / 0), Somnolence (1 / 0)                                                                                                                                                                                                                                                                                                                                                                                                                                                                                                                           |

<sup>a</sup> Crossover trial  
<sup>b</sup> Active placebo = Diphenhydramine  
<sup>c</sup> Incidence of adverse events reported, but total number of participants not provided  
AE = Adverse events. TG = Treatment group. PG = Placebo group
